# Supplementary material
Source: Springer Nature journal article supplement (https://www.springermedizin.de/resource/supplementary/12877_2012_774_MOESM1_ESM.pdf/9440320)
Supplement: MOESM1 [file 9440320]

612 patients

Under 60 (42)  
Not living in Malmö (13)  
Institutional living (43)

514 patients

Transfer to another department (22)  
Prior enrolment (21)  
Lost to early discharge (26)  
Isolation due to norovirus (15)  
Other (5)

425 patients

Terminal disease (29)  
Language barrier (21)  
Blindness (17)  
Deafness (8)  
Aphasia (7)

304 patients

Severe delirium/abnormal laboratory values (39)

236 patients

No consent (69)

200 patients

Transfer (6)  
Acute deterioration (14)  
Early discharge (9)  
Norovirus infection (2)  
Other (4)
